# Supplementary material for: MiR-126-3p and MiR-223-3p as Biomarkers for Prediction of Thrombotic Risk in Patients with Acute Myocardial Infarction and Primary Angioplasty
Source: J Pers Med. 2021 Jun 4;11(6):508. doi: 10.3390/jpm11060508 (PMC8230013; doi:10.3390/jpm11060508)
Supplement: Supplementary file 1 [file jpm-11-00508-s001.zip › jpm-1202782-supplementary.pdf]

MiR-126-3p and MiR-223-3p as Biomarkers for Prediction of Thrombotic Risk in Patients with Acute Myocardial Infarction and Primary Angioplasty.

The PRAGUE-18 Genetic Substudy.

Hromadka, et al.

SUPPLEMENTARY DATA

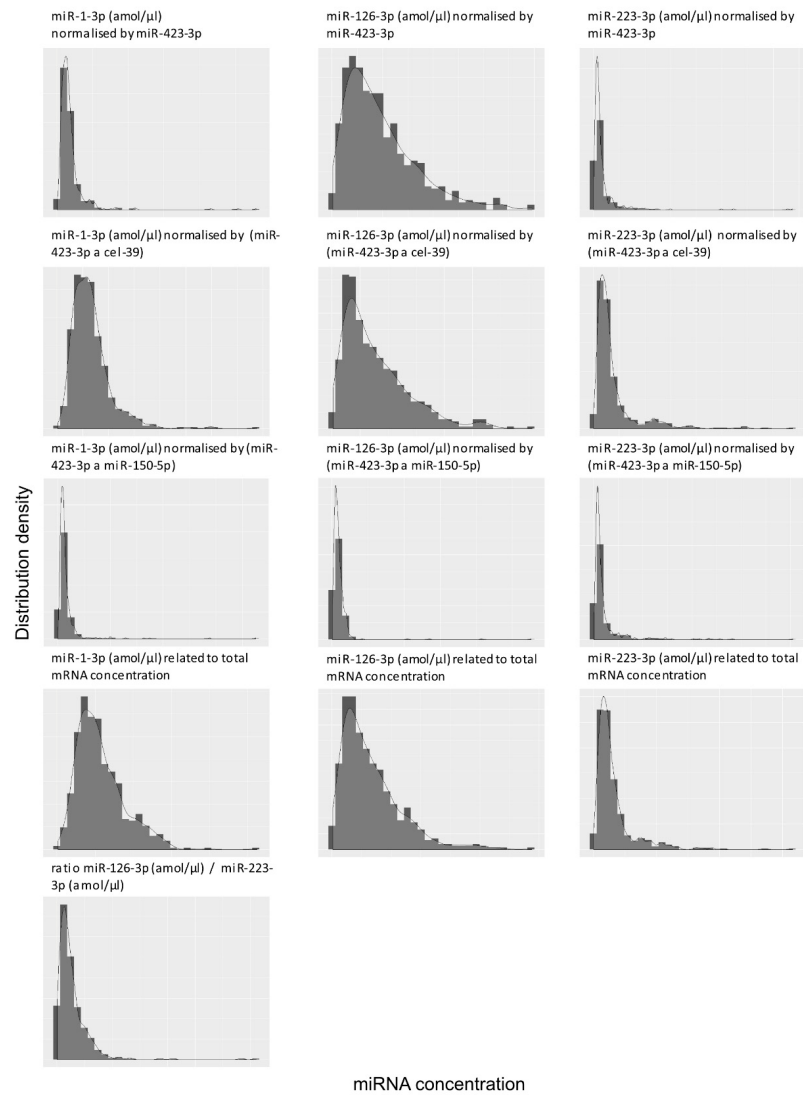

**Supplementary Figure 1** Distribution of miRNA concentration values: charts show the shape of statistical distribution of measured miRNA concentration with individual scale of axis for each chart

The data in our study demonstrate the importance of the normalization strategy when investigating miRNAs in blood. Four miRNAs were selected from publications for data normalization: cel-miR-39-3p, miR-93-5p, miR-150-5p and miR-423-3p. Among them, geNorm suggested using the combination of miR-423 and cell-39 (M-value 0.75), while NormFinder ranked individual miRNA by stability values as follows: miR-150 (0.198) < 423 (0.222) < 39 (0.452) < 93 (0.592). A stability value of 0.2 or less is generally accepted for use in data normalization. Overall, the combinations of miR-150 and 423 (NormFinder), miR-423-3p and cel-miR-39-3p (geNorm), individual miR-423-3p (both NormFinder and geNorm), and additionally the total RNA concentration and the miR-126-3p/miR-223-3p ratio were selected for data normalization.

**Table S\_1A.** MiR-223-3p (amol/μl) normalised by (miR-423-3p a miR-150-5p)

|                                       | Below median <sup>1</sup> | Above median <sup>1</sup> | Nonadjusted OR (95% CI) <sup>2</sup> | p <sup>2</sup> |
|---------------------------------------|---------------------------|---------------------------|--------------------------------------|----------------|
| <b>30 days</b>                        |                           |                           |                                      |                |
| Cardiovascular death                  | 0 (0.0%)                  | 11 (3.7%)                 |                                      |                |
| Re-MI                                 | 0 (0.0%)                  | 6 (2.0%)                  |                                      |                |
| Stroke                                | 1 (0.3%)                  | 0 (0.0%)                  |                                      |                |
| Cardiovascular death   Re-MI   Stroke | 1 (0.3%)                  | 15 (5.0%)                 | 15.739 (2.066; 119.932)              | <b>0.008</b>   |
| Mortality                             | 0 (0.0%)                  | 11 (3.7%)                 |                                      |                |
| Stent thrombosis                      | 0 (0.0%)                  | 6 (2.0%)                  |                                      |                |
| Bleeding                              | 9 (3.0%)                  | 17 (5.7%)                 | 1.942 (0.852; 4.430)                 | 0.114          |
| TIMI - major bleeding                 | 2 (0.7%)                  | 1 (0.3%)                  | 0.498 (0.045; 5.525)                 | 0.570          |
| BARC > 3 bleeding                     | 3 (1.0%)                  | 2 (0.7%)                  | 0.664 (0.110; 4.005)                 | 0.656          |
| <b>365 days</b>                       |                           |                           |                                      |                |
| Cardiovascular death                  | 1 (0.3%)                  | 15 (5.0%)                 | 15.739 (2.066; 119.932)              | <b>0.008</b>   |
| Re-MI                                 | 6 (2.0%)                  | 11 (3.7%)                 | 1.865 (0.681; 5.110)                 | 0.225          |
| Stroke                                | 2 (0.7%)                  | 1 (0.3%)                  | 0.498 (0.045; 5.525)                 | 0.570          |
| Cardiovascular death   Re-MI   Stroke | 8 (2.7%)                  | 24 (8.0%)                 | 3.175 (1.402; 7.186)                 | <b>0.006</b>   |
| Mortality                             | 3 (1.0%)                  | 19 (6.4%)                 | 6.695 (1.960; 22.873)                | <b>0.002</b>   |

|                       |           |            |                       |       |
|-----------------------|-----------|------------|-----------------------|-------|
| Stent thrombosis      | 2 (0.7%)  | 8 (2.7%)   | 4.082 (0.860; 19.387) | 0.077 |
| Bleeding              | 22 (7.4%) | 31 (10.4%) | 1.456 (0.822; 2.579)  | 0.197 |
| TIMI - major bleeding | 2 (0.7%)  | 1 (0.3%)   | 0.498 (0.045; 5.525)  | 0.570 |
| BARC > 3 bleeding     | 3 (1.0%)  | 2 (0.7%)   | 0.664 (0.110; 4.005)  | 0.656 |

---

<sup>1</sup> absolute and relative frequencies for categorical variables

<sup>2</sup> odds ratio and its statistical significance

MI, myocardial infarction; PCI, percutaneous coronary intervention; TIMI, Thrombolysis in Myocardial Infarction; BARC indicates Bleeding Academic Research Consortium.

**Table S\_1B.** MiR-126-3p (amol/μl) to miR-223-3p (amol/μl) ratio

|                                       | Below median <sup>1</sup> | Above median <sup>1</sup> | Nonadjusted OR (95% CI) <sup>2</sup> | p <sup>2</sup> |
|---------------------------------------|---------------------------|---------------------------|--------------------------------------|----------------|
| <b>30 days</b>                        |                           |                           |                                      |                |
| Cardiovascular death                  | 10 (3.3%)                 | 1 (0.3%)                  | 0.097 (0.012; 0.762)                 | <b>0.027</b>   |
| Re-MI                                 | 5 (1.7%)                  | 1 (0.3%)                  | 0.197 (0.023; 1.699)                 | 0.140          |
| Stroke                                | 1 (0.3%)                  | 0 (0.0%)                  |                                      |                |
| Cardiovascular death   Re-MI   Stroke | 14 (4.7%)                 | 2 (0.7%)                  | 0.137 (0.031; 0.609)                 | <b>0.009</b>   |
| Mortality                             | 10 (3.3%)                 | 1 (0.3%)                  | 0.097 (0.012; 0.762)                 | <b>0.027</b>   |
| Stent thrombosis                      | 5 (1.7%)                  | 1 (0.3%)                  | 0.197 (0.023; 1.699)                 | 0.140          |
| Bleeding                              | 17 (5.7%)                 | 9 (3.0%)                  | 0.515 (0.226; 1.174)                 | 0.114          |
| TIMI - major bleeding                 | 1 (0.3%)                  | 2 (0.7%)                  | 2.007 (0.181; 22.250)                | 0.570          |
| BARC > 3 bleeding                     | 2 (0.7%)                  | 3 (1.0%)                  | 1.505 (0.250; 9.073)                 | 0.656          |
| <b>365 days</b>                       |                           |                           |                                      |                |
| Cardiovascular death                  | 14 (4.7%)                 | 2 (0.7%)                  | 0.137 (0.031; 0.609)                 | <b>0.009</b>   |
| Re-MI                                 | 10 (3.3%)                 | 7 (2.3%)                  | 0.693 (0.260; 1.845)                 | 0.463          |
| Stroke                                | 2 (0.7%)                  | 1 (0.3%)                  | 0.498 (0.045; 5.525)                 | 0.570          |

|                                       |            |           |                       |              |
|---------------------------------------|------------|-----------|-----------------------|--------------|
| Cardiovascular death   Re-MI   Stroke | 23 (7.7%)  | 9 (3.0%)  | 0.372 (0.169; 0.819)  | <b>0.014</b> |
| Mortality                             | 16 (5.4%)  | 6 (2.0%)  | 0.362 (0.140; 0.939)  | <b>0.037</b> |
| Stent thrombosis                      | 7 (2.3%)   | 3 (1.0%)  | 0.423 (0.108; 1.651)  | 0.215        |
| Bleeding                              | 30 (10.0%) | 23 (7.7%) | 0.747 (0.423; 1.319)  | 0.315        |
| TIMI - major bleeding                 | 1 (0.3%)   | 2 (0.7%)  | 2.007 (0.181; 22.250) | 0.570        |
| BARC > 3 bleeding                     | 2 (0.7%)   | 3 (1.0%)  | 1.505 (0.250; 9.073)  | 0.656        |

---

<sup>1</sup> absolute and relative frequencies for categorical variables

<sup>2</sup> odds ratio and its statistical significance

MI, myocardial infarction; PCI, percutaneous coronary intervention; TIMI, Thrombolysis in Myocardial Infarction; BARC indicates Bleeding Academic Research Consortium.
